# Supplementary material
Source: publisher figshare collection journal article supplement (https://gsapubs.figshare.com/articles/dataset/_/15063120)

Supplemental Figure S1. The three endmember mixing model for the Anatolian lavas in (a)  $^{87}\text{Sr}/^{86}\text{Sr}$ -  $\epsilon_{\text{Nd}}$  and (b)  $\epsilon_{\text{Hf}}$ - $\epsilon_{\text{Nd}}$  space. All symbols and labels are the same as those shown in figure 6.

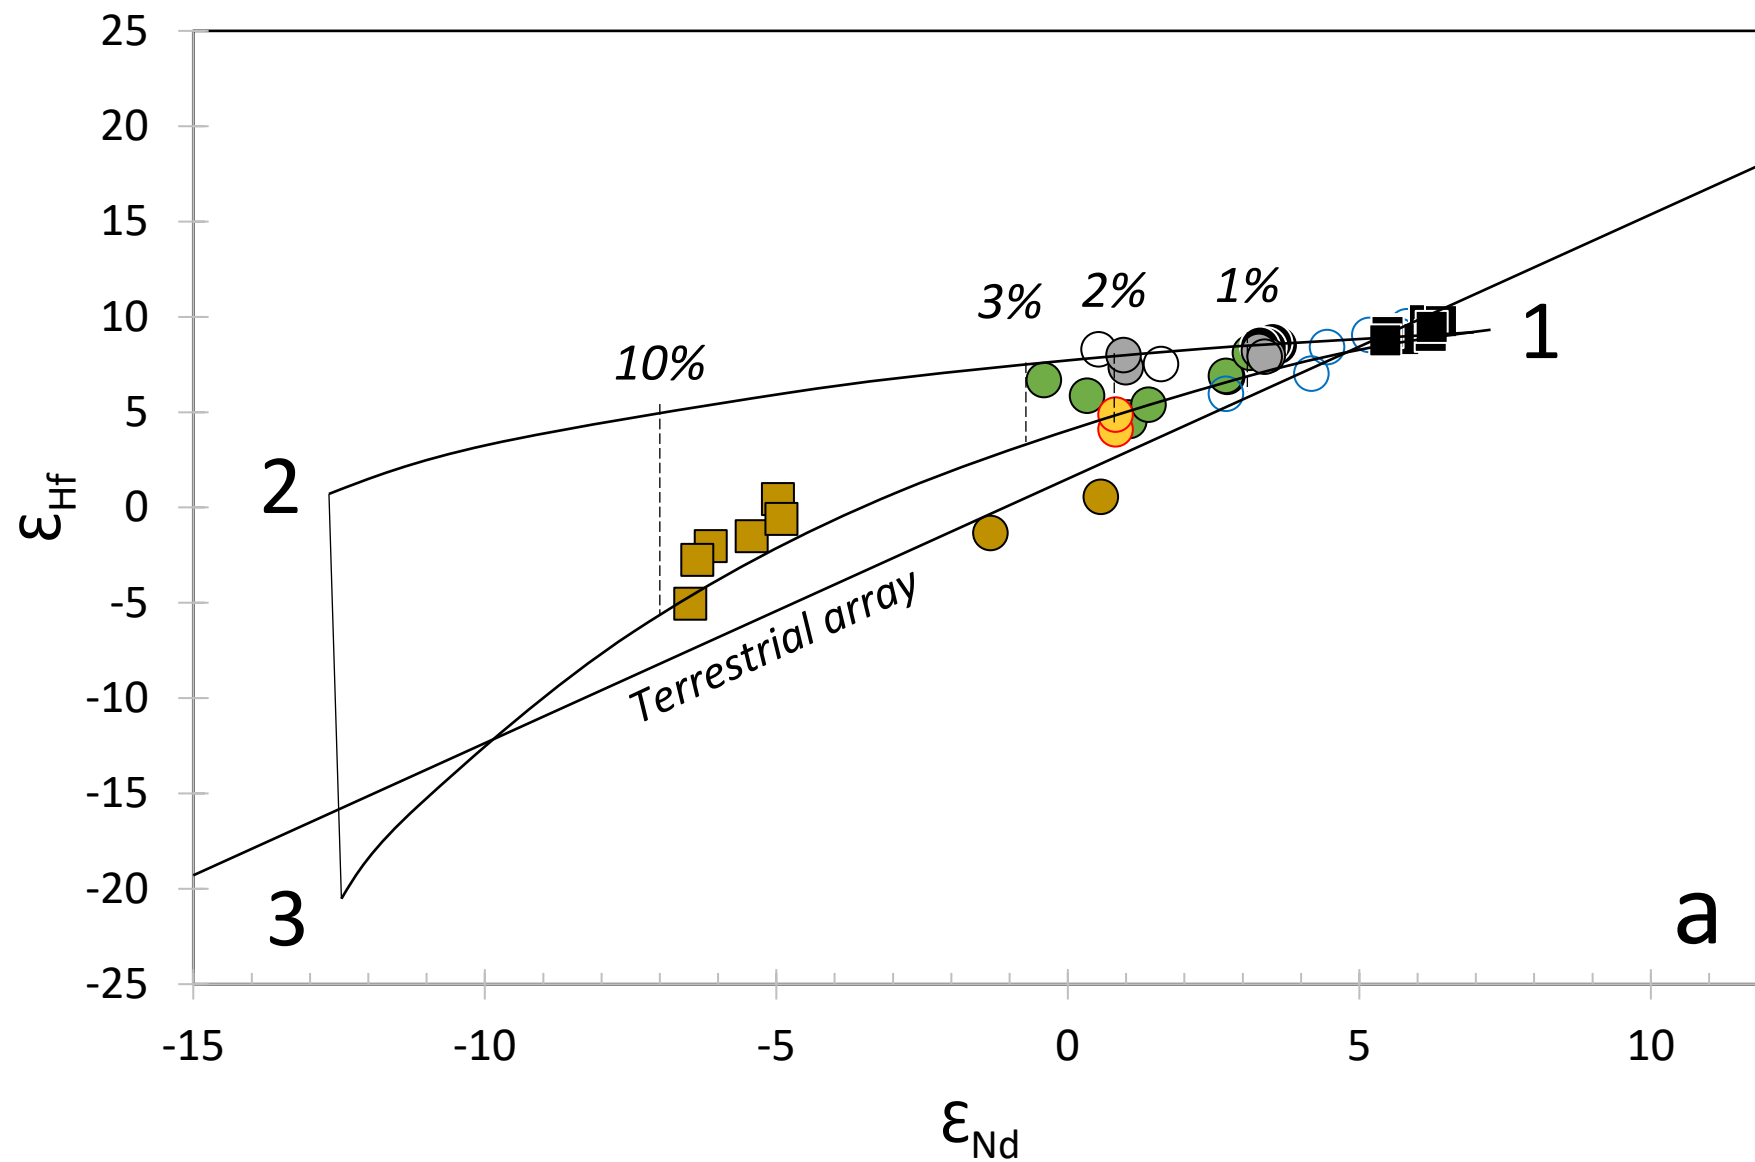

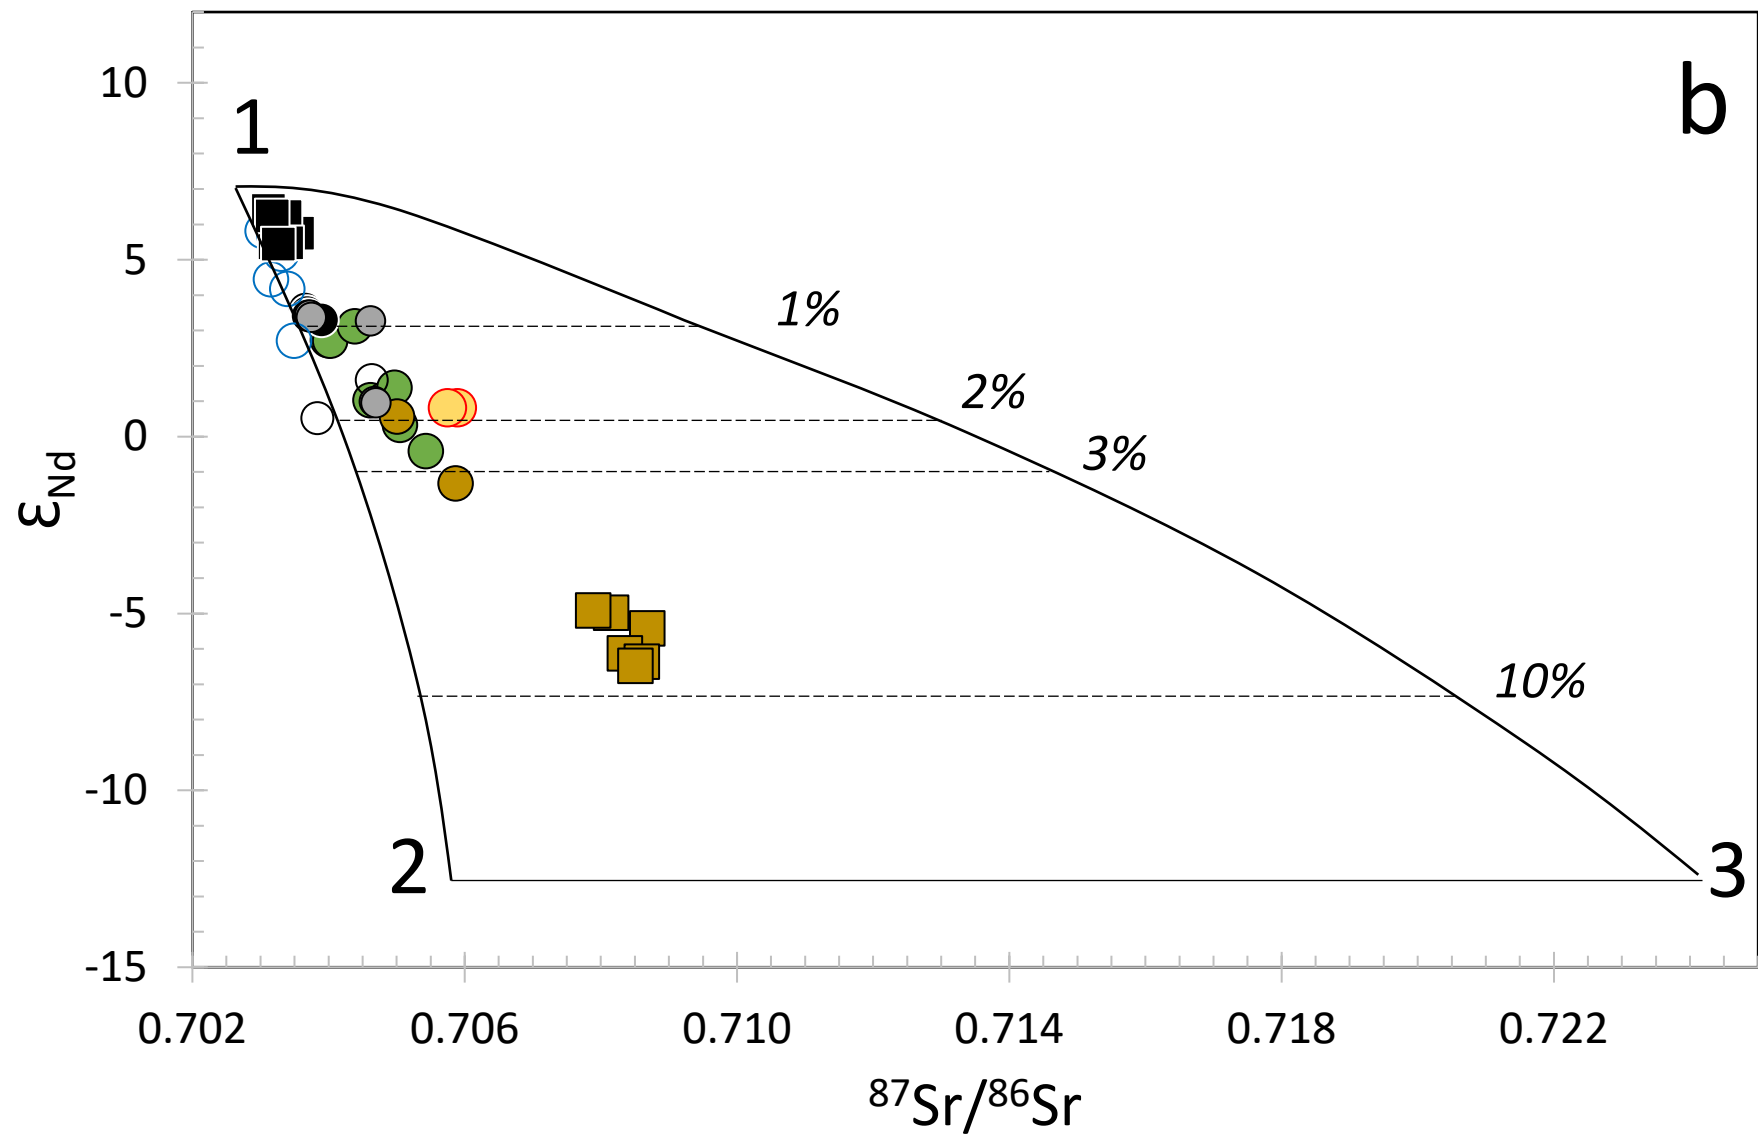

Supplement: Supplementary file 1 [file 1]
