# Supplementary material
Source: publisher figshare collection journal article supplement (https://gsapubs.figshare.com/articles/dataset/_/15063120)
Supplement: Supplementary file 2 [file 1]

# Supplemental Table S1

| End-Members                       | Ambient Mantle (AM) | Crust 1 | Crust 2 |
|-----------------------------------|---------------------|---------|---------|
| $^{206}\text{Pb}/^{204}\text{Pb}$ | 19.15               | 19.5    | 18      |
| $^{207}\text{Pb}/^{204}\text{Pb}$ | 15.57               | 15.92   | 15.57   |
| $^{208}\text{Pb}/^{204}\text{Pb}$ | 38.6                | 40.47   | 38.24   |
| $^{87}\text{Sr}/^{86}\text{Sr}$   | 0.7028              | 0.706   | 0.724   |
| $^{143}\text{Nd}/^{144}\text{Nd}$ | 0.513               | 0.512   | 0.512   |
| $^{176}\text{Hf}/^{177}\text{Hf}$ | 0.283               | 0.2822  | 0.2828  |

## Endmember Mass Proportions

| Crust 1 : AM | Crust 2 : AM |
|--------------|--------------|
| 100          | 100          |
| 44           | 44           |
| 25           | 25           |
| 10           | 10           |
